# Supplementary material for: The importance of spatial resolution in the modelling of methane emissions from natural wetlands
Source: Copernicus journal article supplement (doi:10.5194/bg-2022-55), 2022-03-02
Supplement: Supplementary file [file bg-2022-55-AC2-supplement.pdf]

## Author's response to Reviewer#2 (anonymous)

General comments:

5 This manuscript investigated the importance of spatial resolution in quantifying CH<sub>4</sub> fluxes from natural wetland. My main issue with this manuscript is that the authors made a lot of simplifications (chose certain values/threshold, and 'randomly' took different datasets, for instance using reanalysis soil temperature data and then modelled soil moisture at 5 cm) without sound reasons. By taking a lot of unrealistic values, the authors want to demonstrate the impacts of resolution on the modelled total methane emissions. There are so many steps/simplifications which could lead to different results: such as data resampling approach (how did the authors get different resolutions of wetland maps?), soil moisture and soil temperature dataset used (why only top soil layer, and why took two very different datasets?) and also why use the same dataset to calibrate model parameter and evaluate the results.

15 The authors should really work through their approaches, and thoroughly investigate how different steps/assumption might influence their final results. It is really difficult to understand the simplification/approach and the article is lacking in depth and impartiality. Thus, I would not recommend it for publication in its current form.

20 We thank the reviewer for his/her time and effort to review our manuscript. We acknowledge that rough assumptions have been made, but not necessarily rougher than those used in models that are used to estimate boreal/arctic emissions of methane. The reason for choosing typical values for soil moisture and soil carbon (which may seem just to simplify things even further) is that we came to realize that models, due to their low resolution, effectively use soil moisture and soil carbon values in wetland pixels that deviate significantly from what is measured inside actual wetlands. This is problematic for us since the resolution dependence we study changes with the contrast between wetlands and uplands. So, what may appear as oversimplifications are actually attempts to account for short-comings of existing datasets that might influence the size of the resolution dependence that we estimate. Simplifications also serve the purpose of clearly explaining and isolating the resolution impact that we are after. They are followed by attempts to compute resolution dependences in more refined datasets. Therefore, we effectively do both, simple and detailed, comment on their differences and potential implications.

30 We are happy to make an additional attempt to further clarify the choices that are made. However, we were surprised that the point about simplifications led to the recommendation to reject our paper. The only argument to reject is the point about simplified datasets, which would have been valid if other choices of existing datasets would obviously have resulted in a significantly different and better estimates of resolution dependence. However, no argumentation along this line is provided. We are of the opinion that paper rejections should be accompanied by thorough argumentation. In this case, the rejection recommendation lacks the supporting argumentation. In our opinion it does not make sense to reject a paper just because a simplified approach has been taken to make a scientific point, unless the approach makes the outcome invalid. For this, in our case, no argumentation is given.

40 **Specific comments:**

L42-43: Another important process which could contribute to the differences between top-down and bottom-up methods are the details in CH<sub>4</sub> transport pathways.

**Response:** Thank you for this suggestion, which we have included in the manuscript.

45 L128, the unit for the K<sub>CH<sub>4</sub></sub> is not correct. The authors should define the meaning of K values, especially if using T<sub>0</sub> equals to 273.15.

**Response:** The unit that is mentioned did not refer to K<sub>CH<sub>4</sub></sub> but to the methane emission. The unit of K<sub>CH<sub>4</sub></sub> has been added to avoid confusion. A clearer definition of K<sub>CH<sub>4</sub></sub> is added too.

L134, Is it true to assume all upland soils take up methane?

50 **Response:** No, but the sentence that the reviewer refers to does not mention that. It states that upland soils take up methane, which is true in most cases.

L157-158, what do you mean by “network density”? Then in the earlier part of the sentence, it says the reason to choose this study area is due to data availability at a few sites, but then it turns out only 2 sites were monitored. It reads contradictory.

55 **Response:** It is true that the measurement availability in Scandinavia is relatively high compared with other regions in the Boreal/Arctic zone. However, we agree that “higher network density” suggests something else. We have reformulated this part to avoid contradiction. The sites that were used have by far the longest and most complete measurement record, explaining our choice.

L176: why here comes with scenario 5 now? I did not follow here.

**Response:** Sorry for this mistake, which came from an earlier version. This problem has been fixed.

60 L176-182, I am not sure I follow the authors’ argument to make this type of assumption. 1, why do you need to stick to the highest density values from a dataset that is limited by the peat fractions? 2. It is fine to just assume zero emissions from upland soil, but on L180-192, why this assumption is linked to different soil carbon contents?

65 **Response:** for the first question: maximum values are used because mixed wetland/upland grid boxes will have lower soil moisture and soil carbon values than the fraction that is covered by wetlands. The typical values that we found in literature for wetlands corresponded reasonably well with the maximum value in the dataset, supporting our approach.

70 Second point: Zero values were used for uplands so that our simple wetland model only yields methane emissions over wetlands. We agree that this assumption overestimates the soil moisture and soil carbon contrast between wetland and upland, and thereby the resolution dependence, which we address using other scenarios. A sentence was added to explain this more clearly

75 - L192-193, not sure why you only need to use the top 5 cm soil layer, and which approach did you use it for resampling? It is not clear for me why you introduce another hydrological model for getting soil moisture? Have you evaluated the modelled soil moisture? Why not use the soil moisture data from ERA5?

**Response:** This question is composed of different questions, which we respond to each individually below.

why you only need to use the the top 5 cm soil layer?

80 The study of Shao et al., (2017) showed that the CH<sub>4</sub> production potential of the top 5 cm soil layer at different water levels is higher than that of other soil levels.

which approach did you use it for resampling?

**Response:** The resampling is simply a re-gridding. Since the resolution is changed in integer intervals this is straightforward.

85 It is not clear for me why you introduce another hydrological model for getting soil moisture? Have you evaluated the modelled soil moisture? Why not use the soil moisture data from ERA5?

**Response:**

This study uses the same hydrological model for estimating methane emissions as used in Petrescu et al., (2010) see(<https://doi.org/10.1029/2009GB003610>)

90 It has been tested used and evaluated in several studies (e.g. Sutanudjaja et al., 2018) see (<https://gmd.copernicus.org/articles/11/2429/2018/>).

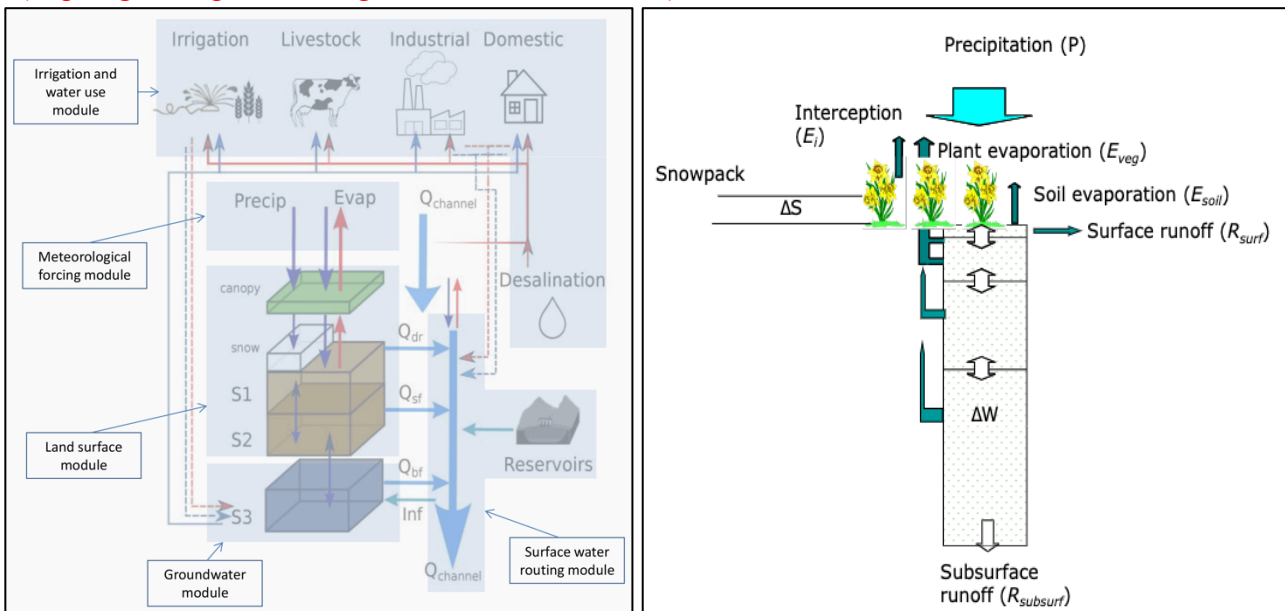

95 As shown in the figure above, the PCR-GLOBWB (left) hydrological model has a more sophisticated representation of hydrology than HTESSEL (right) used in ERA-5, which is a reason why we prefer its use over ERA-5.

L 208-210: not clear how the authors obtain the  $K_{CH_4}$  value? What values did you get for  $K_{CH_4}$ ?

100 **Response:** The  $K_{CH_4}$  is obtained by ‘calibrating’ our model to observations. The values are mentioned in the text (line 258:273) and in Figure 6.

Figure 3, where are the color legend?

**Response:** The Legend is in the appendix (Figure A-3). The figure will be revised in the final vision with a wetland distribution map for the study area so that the legend will fit in the figure.

Figure 4, why are there emissions for Sn2 if you only have upland?

105 **Response:** This question was raised also by RC#1. Here is the answer:

We assume that the answer of this question is fulfilled from line 136 to 141. “In Sn.2 uplands are treated as the wetlands in Sn.1.  $CH_4$  oxidation in upland soils may show a resolution-dependence following the logic of section 2.1 also. However, since the upland fraction is generally substantially larger than the wetland fraction at spatial resolutions that are common in global wetland modelling, the sensitivity of the sink to resolution is expected to be less important (see equation 4). The setup of Sn.2 is meant to isolate the impact of the difference between wetland and upland fraction on the resolution dependence, which explains why the method to compute the flux is kept the same”

110

Figure 6, not clear for me how you can use the same observation data to calibrate  $K_{CH_4}$  and then evaluate the calculated model, please clarify this.

115 **Response:** This is indeed a valid concern. Nevertheless, it is useful to make this comparison because we only calibrated our model using a single  $K_{CH_4}$  value, which scales the model output but otherwise does not influence the comparison between model and data. Figure 6 is not meant to evaluate  $K_{CH_4}$  but to assess the performance of the model given an optimised  $K_{CH_4}$ .
